# Supplementary figures and images for: Manganism without Parkinsonism: Isolated Unilateral Upper Limb Tremor in a Welder
Source: PubMed Central journal article supplement — J Mov Disord. 2019 Apr 5;12(2):135–7. doi: 10.14802/jmd.18068 (PMC6547032; doi:10.14802/jmd.18068), 2019-04-05

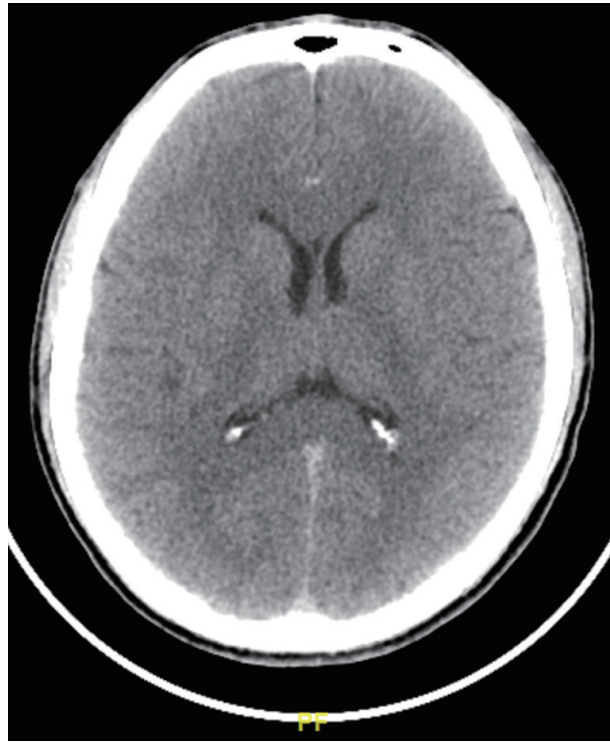

**Supplementary Figure 1.** Normal CT scan with no evidence of calcification.

Supplement: jmd-18068-suppl.pdf [file jmd-18068-suppl.pdf]
